# Supplementary material for: Interannual variability of summertime formaldehyde (HCHO) vertical column density and its main drivers in northern high latitudes
Source: Copernicus journal article supplement (doi:10.5194/egusphere-2023-1431), 2023-07-25
Supplement: Supplementary file 1 [file egusphere-2023-1431-supplement.pdf]

# **Interannual variability of summertime formaldehyde (HCHO) vertical column density and its main drivers in northern high latitudes**

Tianlang Zhao<sup>1</sup>, Jingqiu Mao<sup>1</sup>, Zolal Ayazpour<sup>2,3</sup>, Gonzalo González Abad<sup>3</sup>, Caroline R

5 Nowlan<sup>3</sup>, Yiqi Zheng<sup>1</sup>

<sup>1</sup> University of Alaska Fairbanks, Department of Chemistry and Biochemistry & Geophysical Institute, Fairbanks, AK, United States

<sup>2</sup> University at Buffalo, Department of Civil, Structural and Environmental Engineering, Buffalo, NY, United States

10 <sup>3</sup> Center for Astrophysics, Harvard & Smithsonian, Cambridge, MA, United States

*Correspondence to:* Tianlang Zhao ([tzhao@alaska.edu](mailto:tzhao@alaska.edu)) and Jingqiu Mao ([jmao2@alaska.edu](mailto:jmao2@alaska.edu))

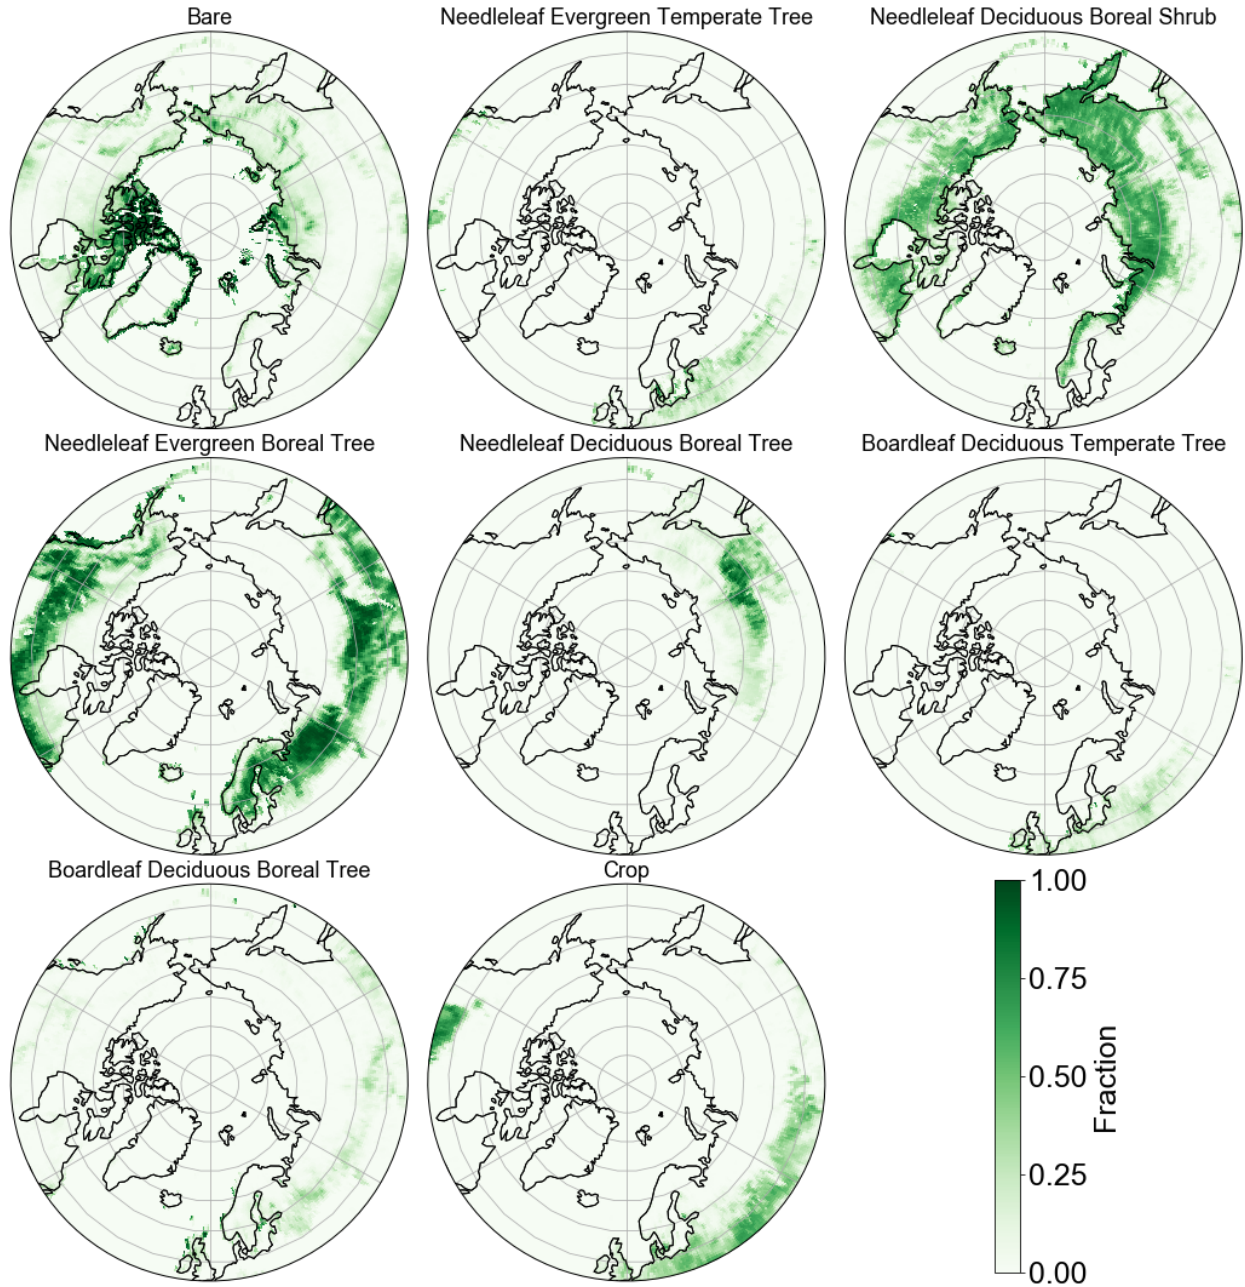

**Figure S1. Fraction of major plant functional types (PFTs) over northern high latitudes. The PFT distribution is from CLM4 model for the year 2000, with a horizontal resolution of  $0.25^{\circ} \times 0.3125^{\circ}$ .**

5

**Table S1. Definition of high HCHO VCD years in four study regions from GEOS-Chem, in the year 2005-2019**

| Region          | High HCHO years                         |
|-----------------|-----------------------------------------|
| Eastern Europe  | 2006 2007 2010 2011 2013 2014 2016      |
| Siberia         | 2006 2012 2013 2014 2016 2017 2018 2019 |
| Northern Canada | 2010 2012 2013 2014 2015 2017           |
| Alaska          | 2005 2009 2013 2015 2017 2019           |

5

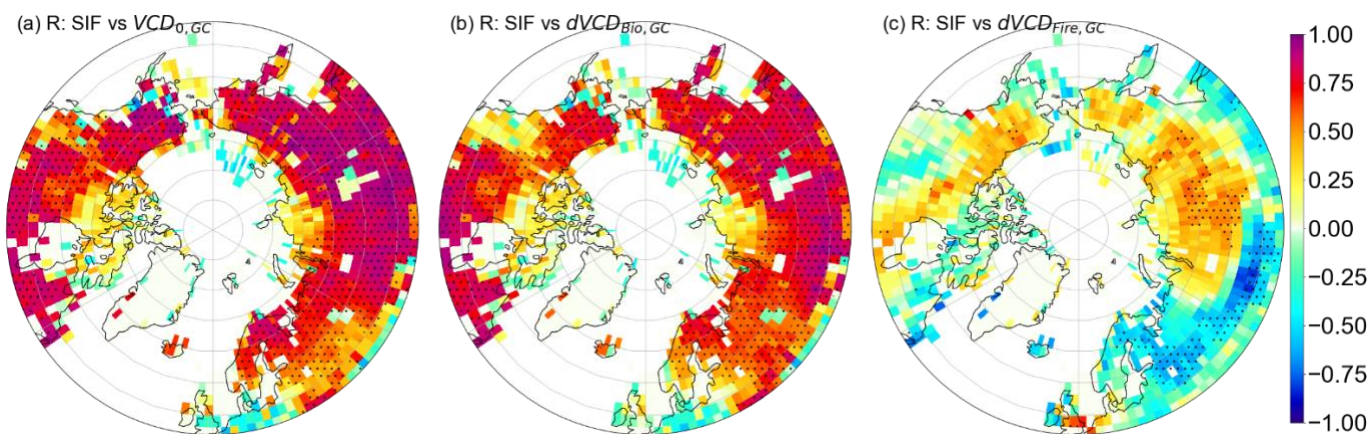

**Figure S2 | Pearson linear correlation between OCO-2 SIF and GEOS-Chem dVCDs in northern high latitudes, in summers from 2015 to 2019. (a) SIF vs  $dVCD_{Bio,GC}$ . (b) SIF vs  $dVCD_{Bio,GC}$ . (c) SIF vs  $dVCD_{Fire,GC}$ . Dotted area has  $p < 0.05$  in a significance t-test.**

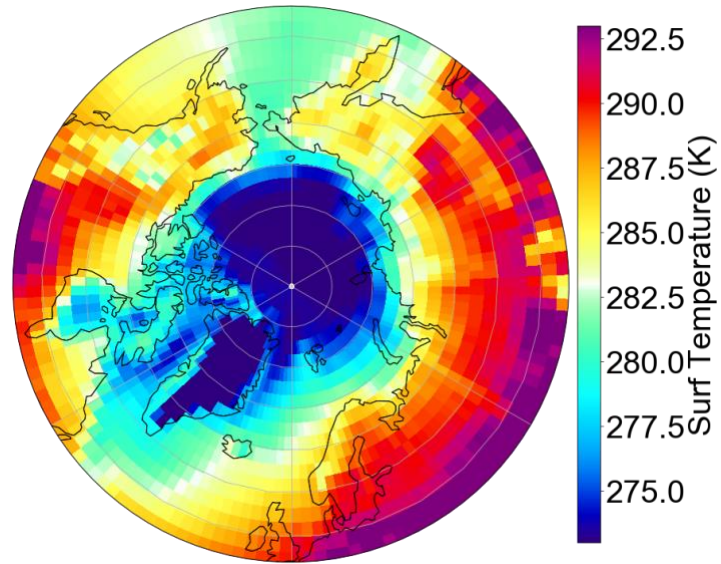

*Figure S3. Monthly mean surface air temperature in northern high latitudes, Julys of 2012-2019.*
